# Supplementary material for: Facile synthesis of pyrazolopyridine pharmaceuticals under mild conditions using an algin-functionalized silica-based magnetic nanocatalyst (Alg@SBA-15/Fe3O4)
Source: Royal Society of Chemistry journal article supplement (doi:10.1039/d2ra07228a), 2023-01-01
Supplement: d2ra07228a1.pdf [file d2ra07228a1.pdf]

## Supplementary Material

### Facile Synthesis of Pyrazolopyridine Pharmaceuticals under Mild Conditions by an Algin-Functionalized Silica-Based Magnetic Nanocatalyst (Alg@SBA-15/Fe<sub>3</sub>O<sub>4</sub>)

*Fereshte Hassanzadeh-Afruzi, Zeinab Amiri-Khamakani, Mahdi Saeidirad, Reza Taheri-Ledari, Ali Maleki\**

*Catalysts and Organic Synthesis Research Laboratory, Department of Chemistry, Iran University of Science and Technology, Tehran 16846-13114, Iran.*

*\*Corresponding author. E-mail: [maleki@iust.ac.ir](mailto:maleki@iust.ac.ir); Fax: +98-21-73021584; Tel: +98-21-73228313.*

 Author's ORCIDs:

*Fereshteh Hasanzadeh-Afruzi: <https://orcid.org/0000-0003-0570-2506>*

*Reza Taheri-Ledari: <https://orcid.org/0000-0002-6511-9411>*

*Ali Maleki: <https://orcid.org/0000-0001-5490-3350>*

### Table of Content

| Content                                                                                                                      | Page  |
|------------------------------------------------------------------------------------------------------------------------------|-------|
| Comparison of the prepared Alg@SBA-15/Fe <sub>3</sub> O <sub>4</sub> with other catalytic systems                            | S1-S2 |
| Figure S1-S8-Copies of <sup>1</sup> H, <sup>13</sup> C NMR, and Mass spectra of compounds <b>5a</b> , <b>5d</b> , <b>5 j</b> | S3-10 |

### Comparison of the prepared Alg@SBA-15/Fe<sub>3</sub>O<sub>4</sub> with other catalytic systems

In order to better understand the catalytic performance and advantages of the Alg@SBA-15/Fe<sub>3</sub>O<sub>4</sub> catalytic system in the synthesis of pyrazolopyridine derivatives, the necessary conditions and yield of fabricated catalytic system in the synthesis of 5b derivative was compared with a number of other catalysts that have synthesized the same product so far. According to Table S1 (see supplementary information), it seems that the method investigated in this study is appropriate approach for the pyrazolopyridine derivatives.

**Table S1.** Comparison of the catalytic activity of the Alg@SBA-15/Fe<sub>3</sub>O<sub>4</sub> with several reported catalysts for the synthesis of pyrazolopyridine derivatives (product **5b**).

| Entry | Catalyst                                                                | Catalyst loading | Conditions                         | Yield <sup>a</sup> (%) |
|-------|-------------------------------------------------------------------------|------------------|------------------------------------|------------------------|
| 1     | CuFe <sub>2</sub> O <sub>4</sub> @HNTs nanocatalyst                     | 0.05 g           | EtOH, room temperature,<br>20 min  | 95 <sup>8</sup>        |
| 2     | pseudopolymeric magnetic nanoparticles                                  | 0.01 g           | EtOH, room temperature,<br>120 min | 45 <sup>43</sup>       |
| 3     | FeNi <sub>3</sub> -ILs MNPs                                             | 0.002 g          | EtOH, 45 min                       | 84 <sup>44</sup>       |
| 4     | Nano-CuCr <sub>2</sub> O <sub>4</sub>                                   | 4 mol%           | EtOH, 45 min, 25 °C                | 91 <sup>48</sup>       |
| 5     | Fe <sub>3</sub> O <sub>4</sub> @SiO <sub>2</sub> -SO <sub>3</sub> H NPs | 0.004 g          | EtOH, 25 °C, 15 min, 500<br>MW     | 94 <sup>49</sup>       |
| 6     | Alg@SBA-15/Fe <sub>3</sub> O <sub>4</sub>                               | 0.02 g           | 20 min, EtOH, r.t.                 | 97 <sup>a</sup>        |

<sup>a</sup> This work

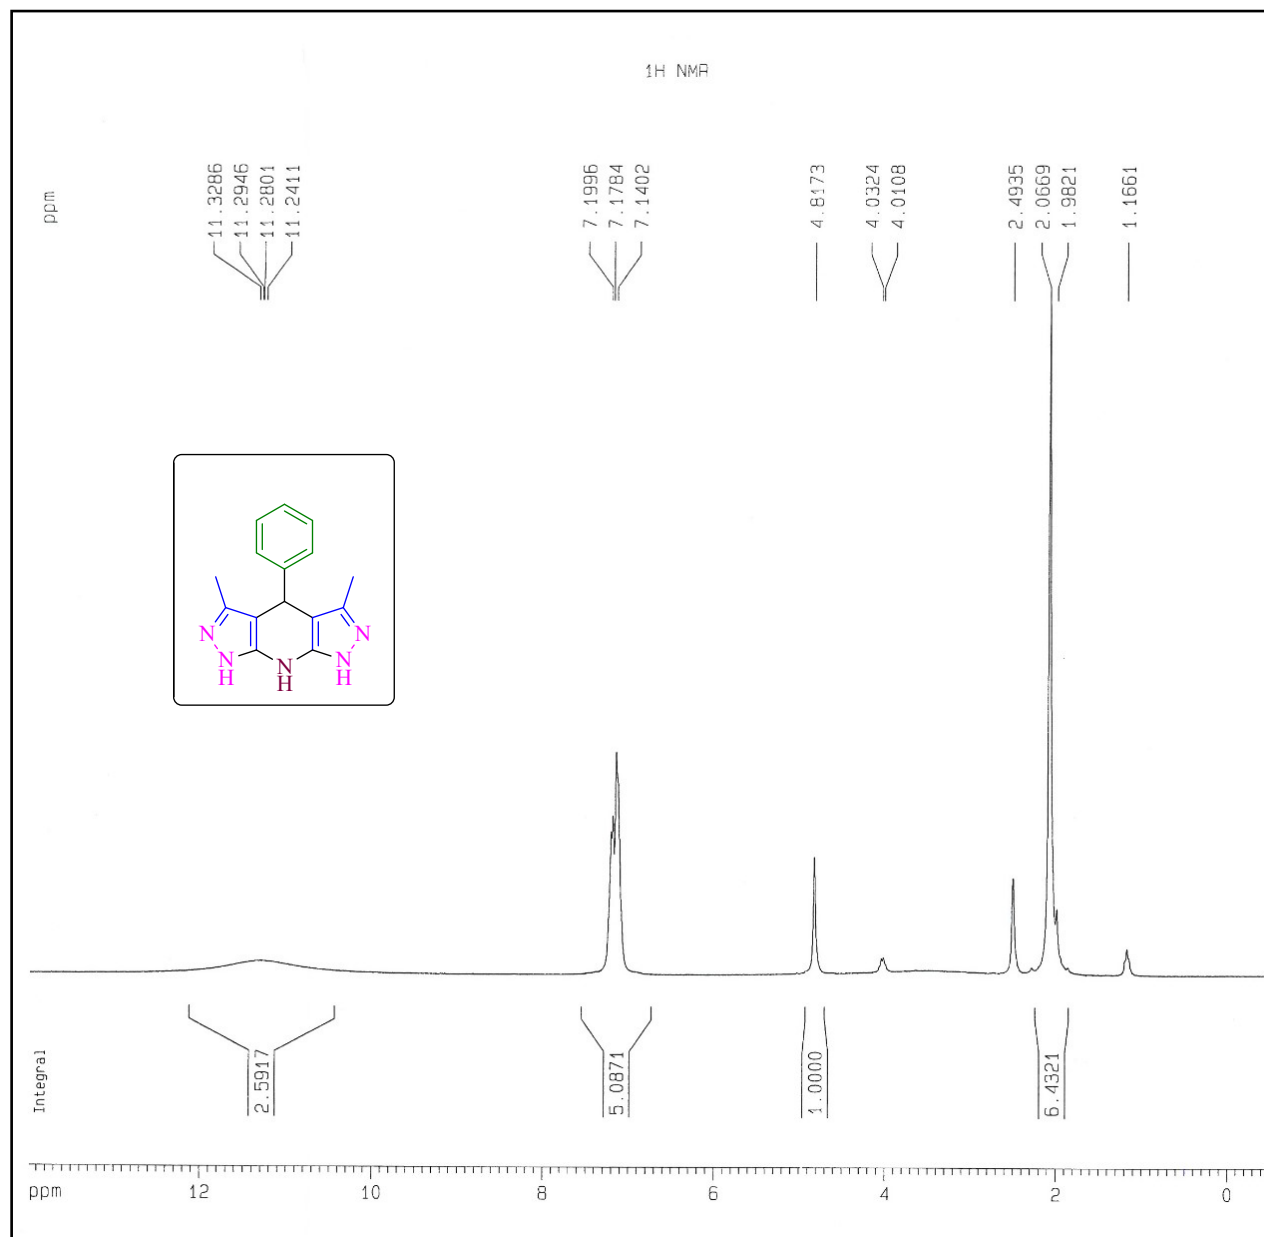

Figure S1. <sup>1</sup>H NMR spectrum of compound (5a)

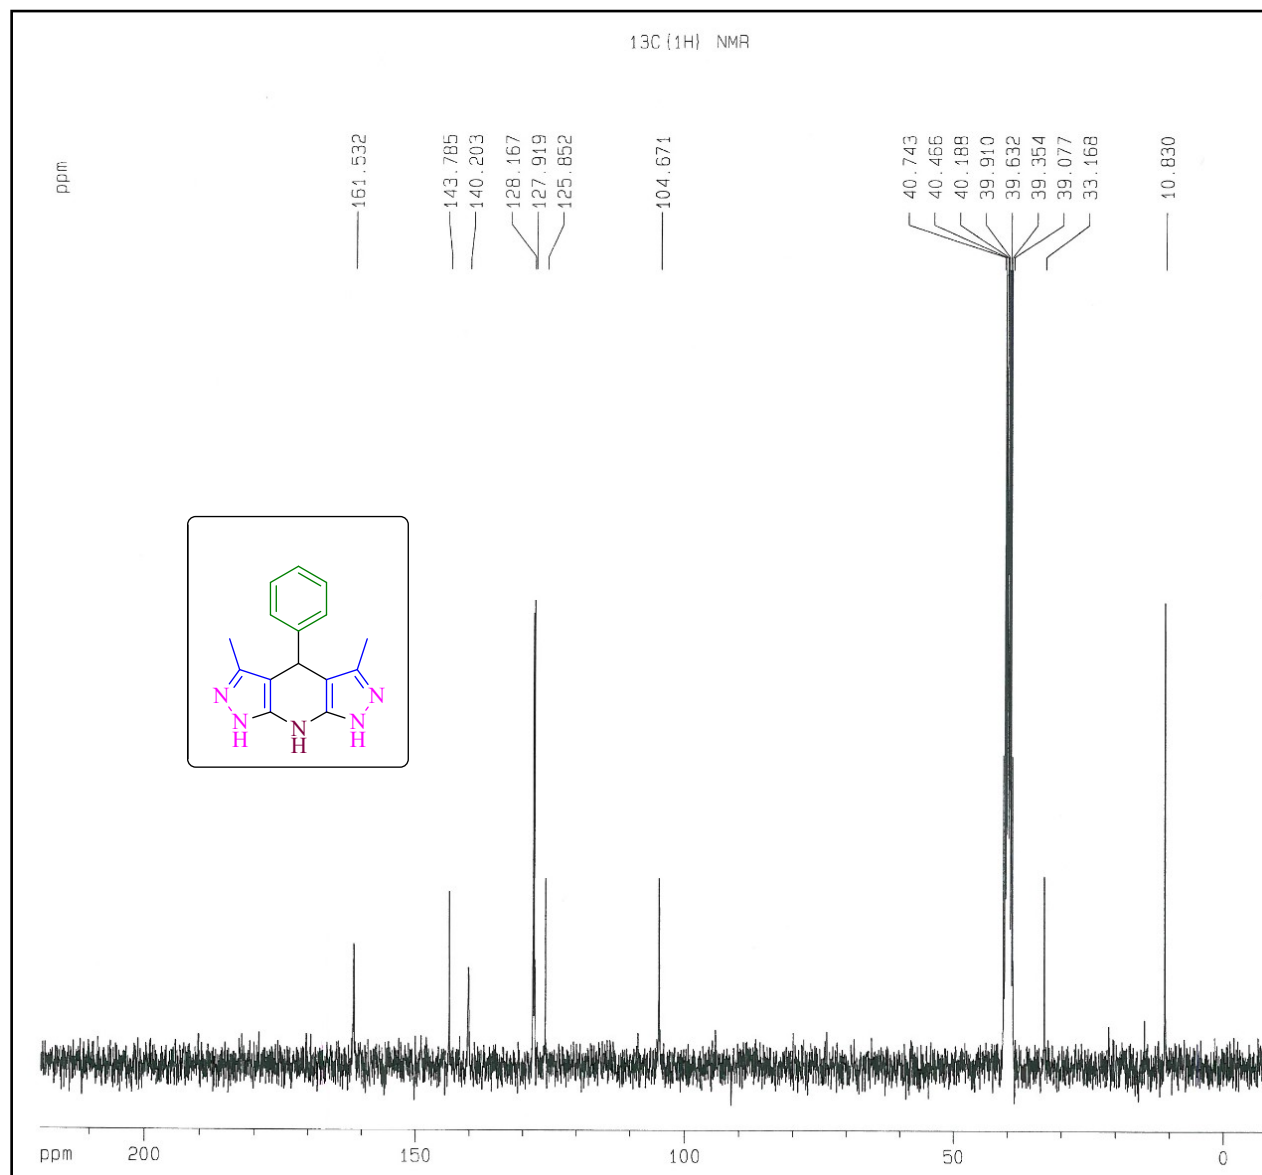

Figure S2. <sup>13</sup>C NMR spectrum of compound (5a)

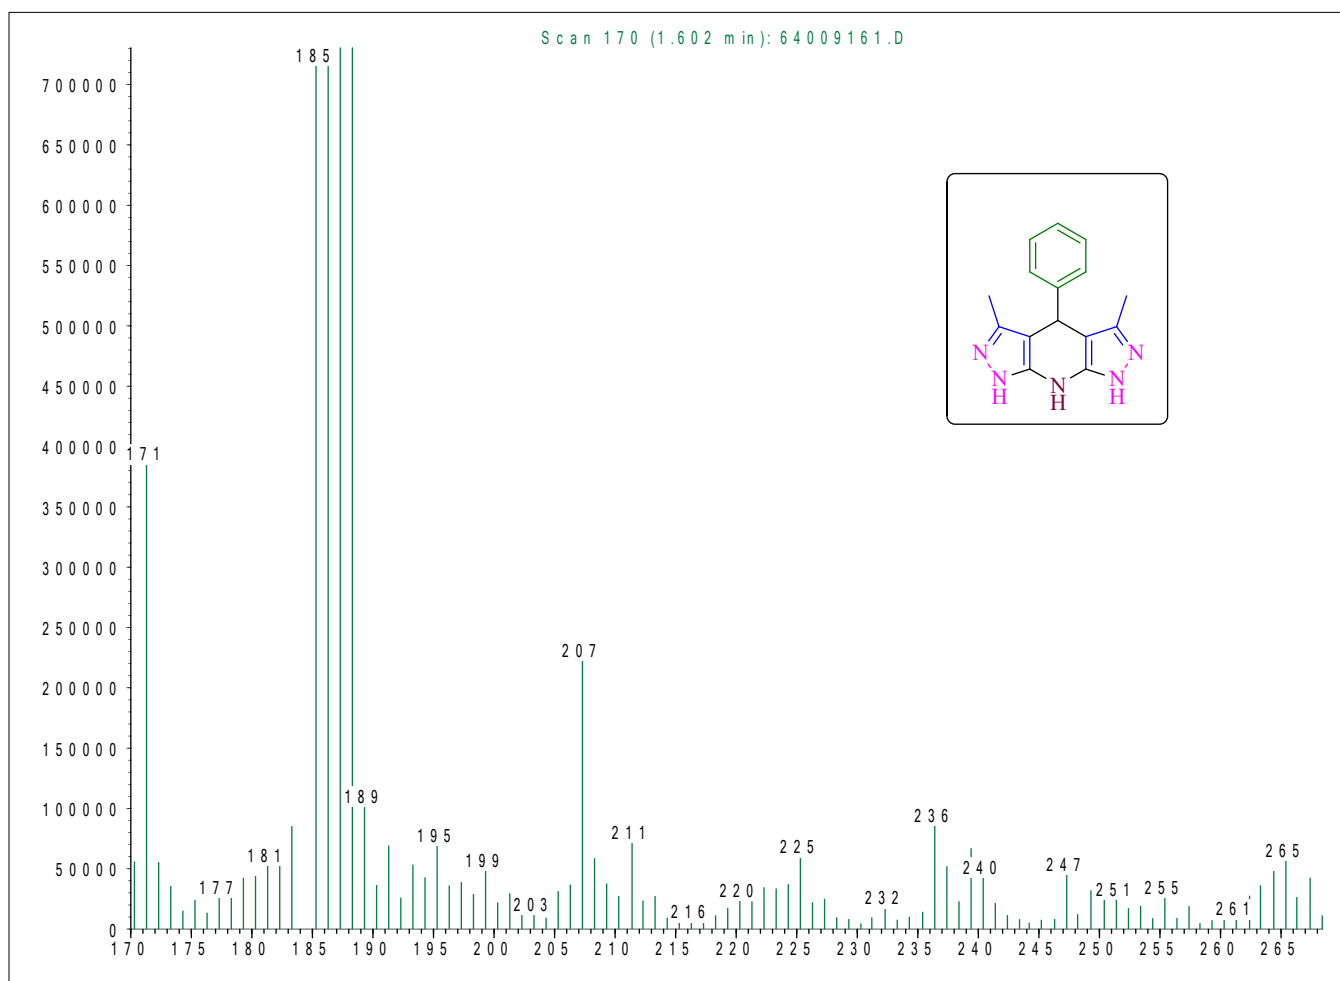

**Figure S3.** Mass spectrum of compound (**5a**)

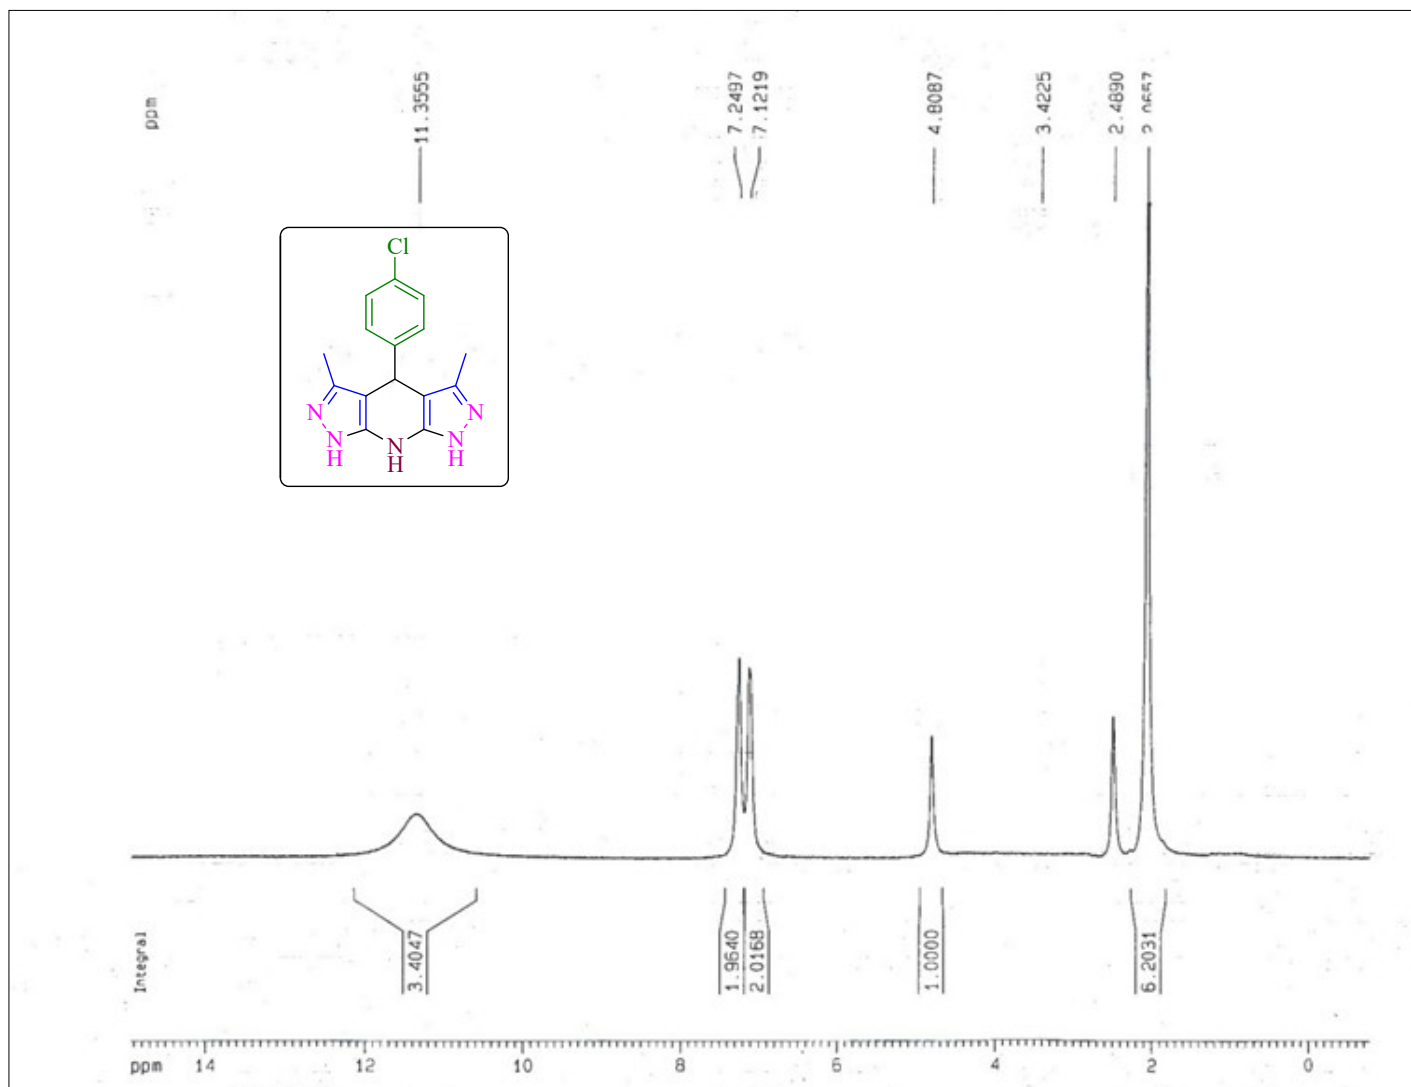

Figure S4. <sup>1</sup>H NMR spectrum of compound (5d)

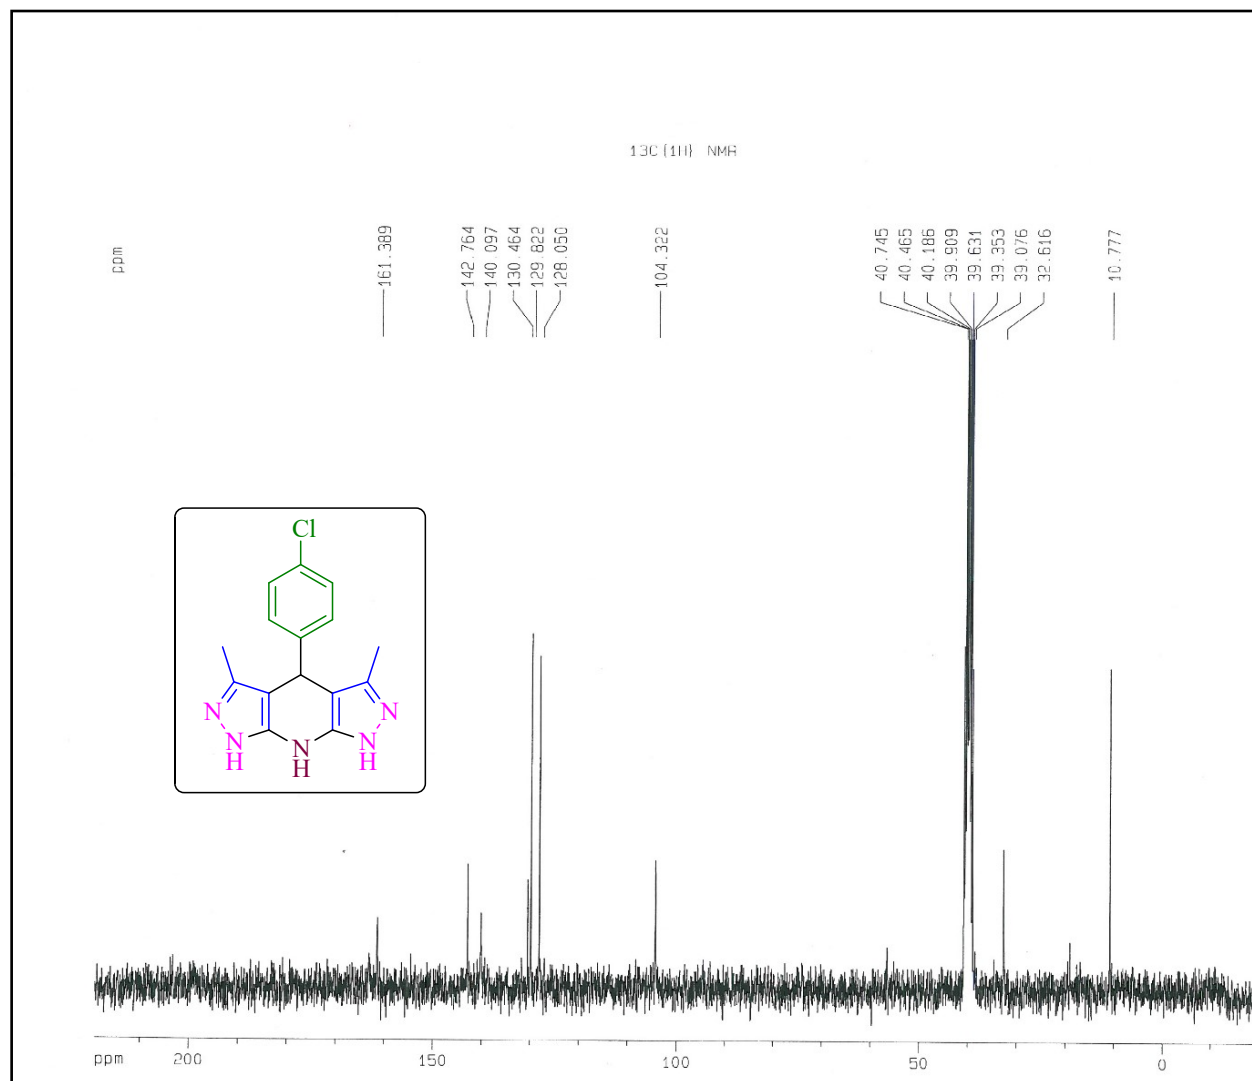

Figure S5. <sup>13</sup>C NMR spectrum of compound (5d)

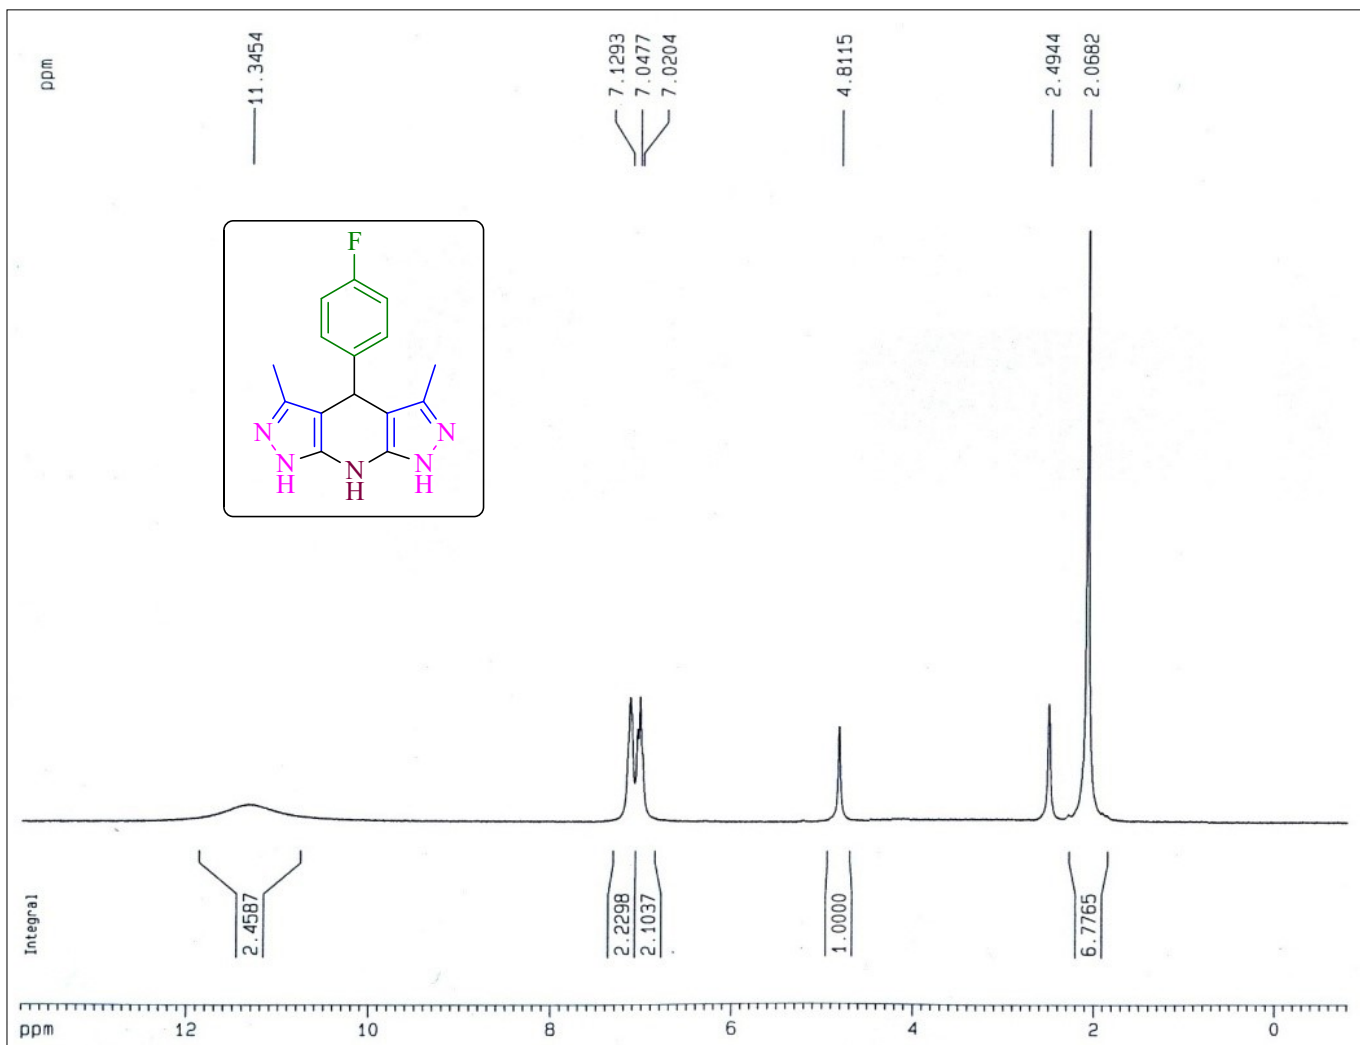

Figure S6.  $^1\text{H}$  NMR spectrum of compound (5j)



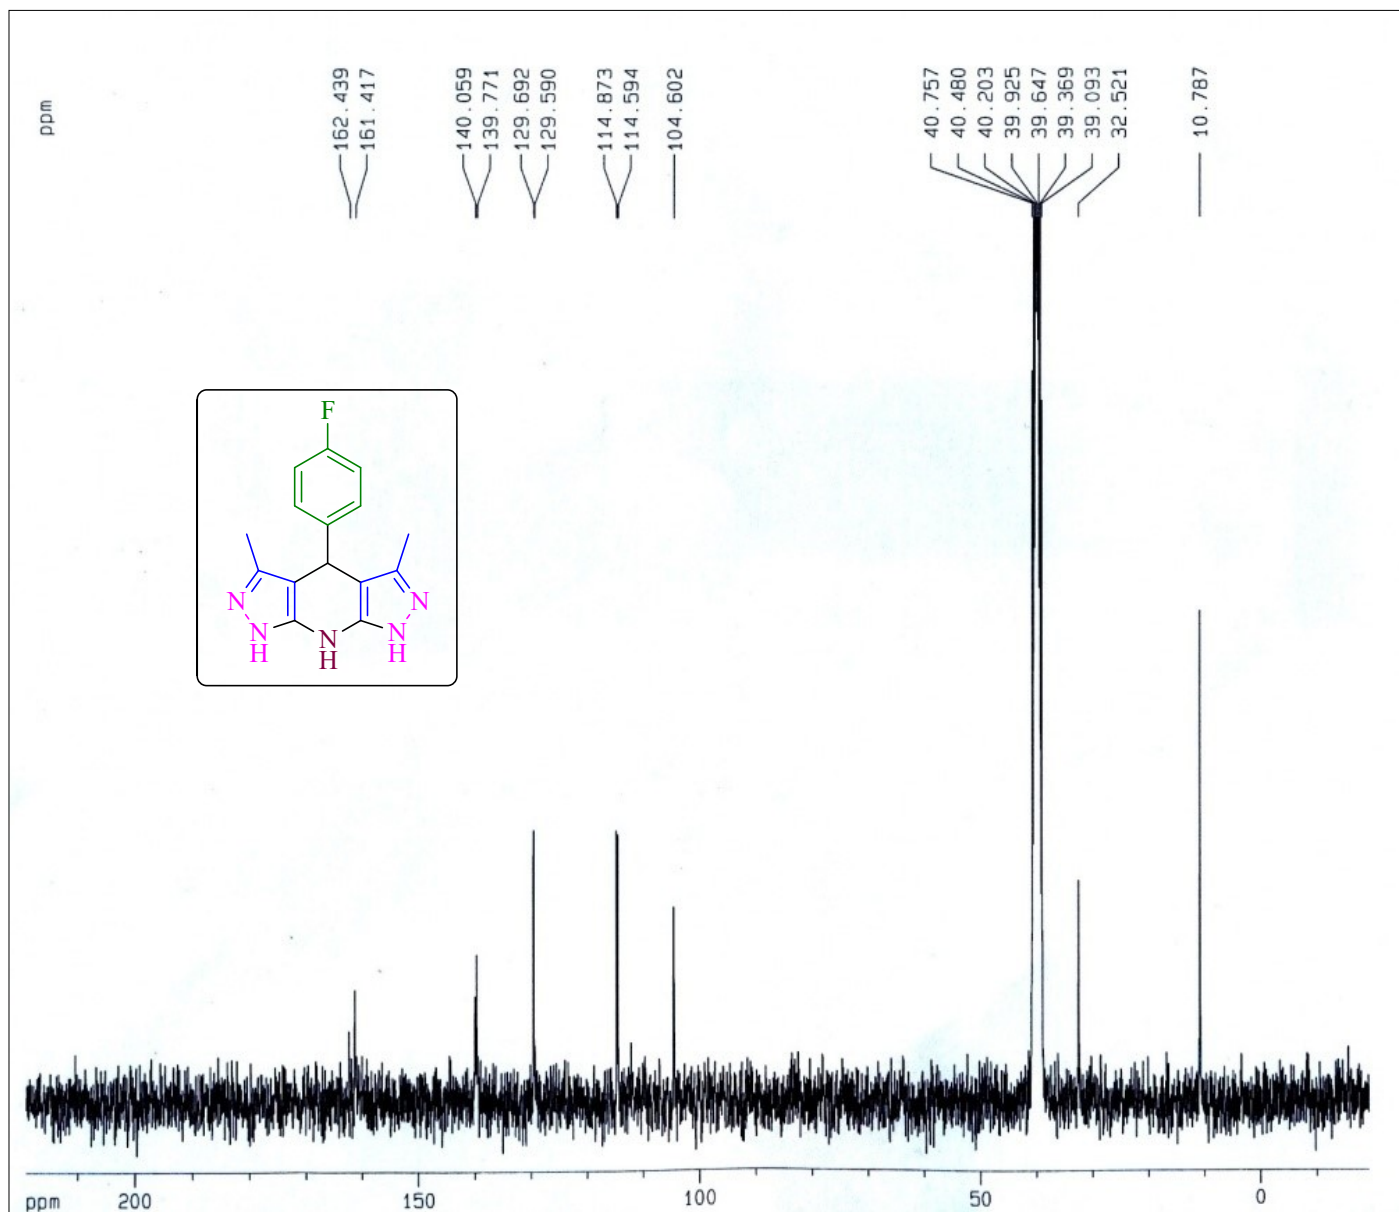

Figure S7. <sup>13</sup>C NMR spectrum of compound (5j)

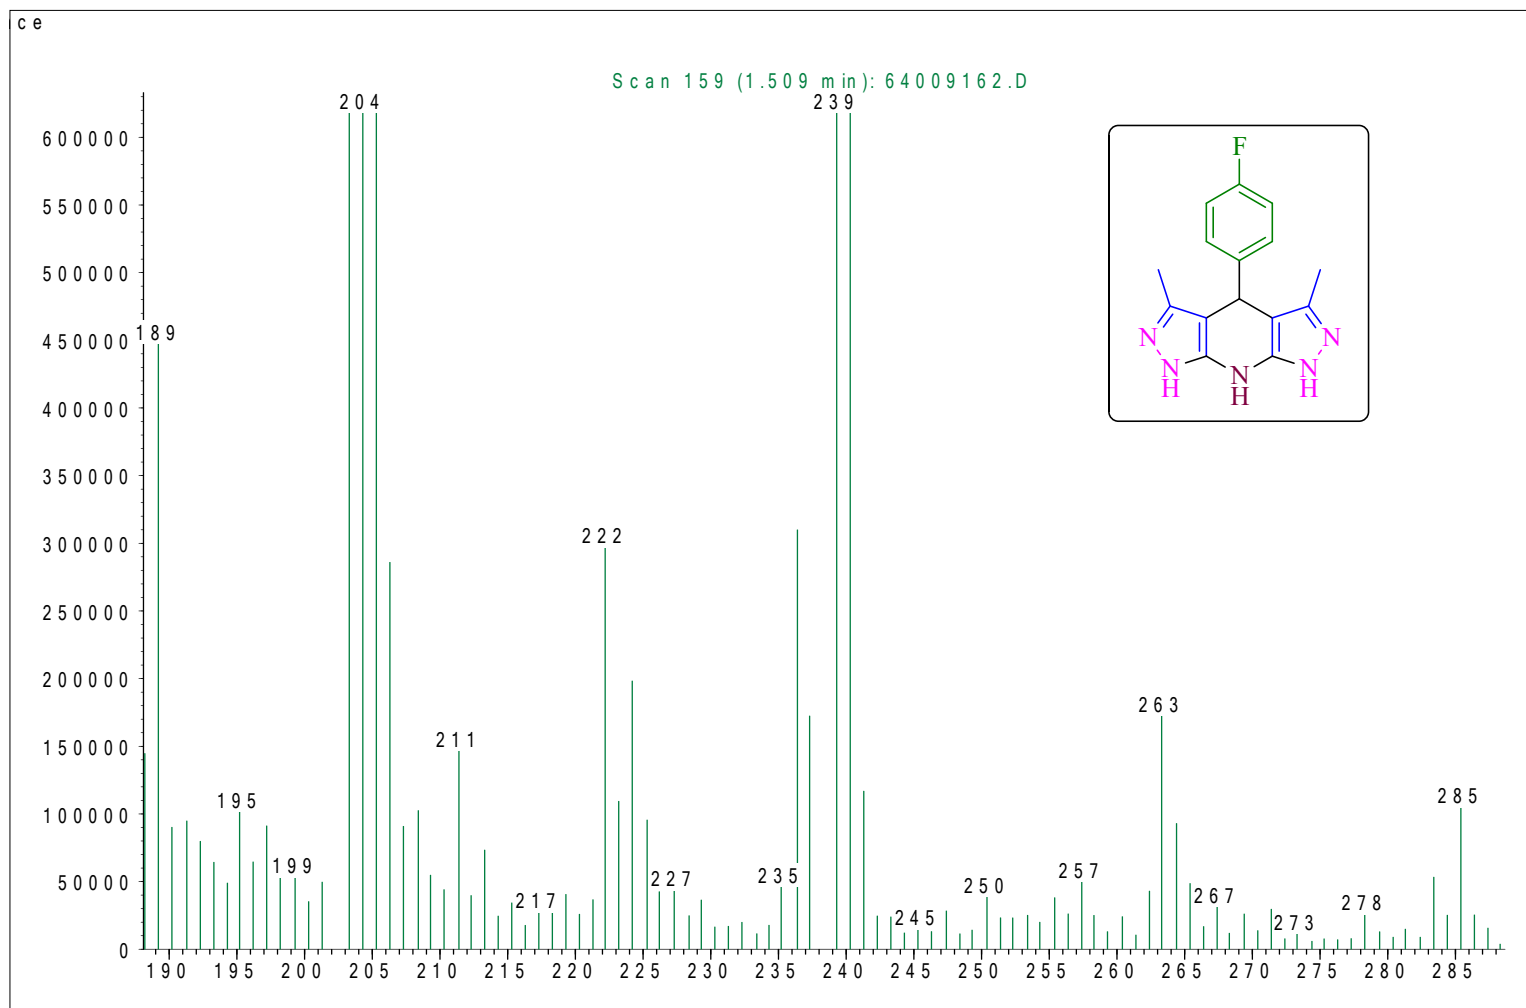

Figure S8. Mass spectrum of compound (5j)
